# Supplementary material for: Structure-Based Drug Design Studies Toward the Discovery of Novel Chalcone Derivatives as Potential Epidermal Growth Factor Receptor (EGFR) Inhibitors
Source: PubMed Central journal article supplement (PMC6321200; doi:10.3390/molecules23123203), 2018-12-05
Supplement: molecules-23-03203-s001.pdf [file molecules-23-03203-s001.pdf]

# Supplementary Materials

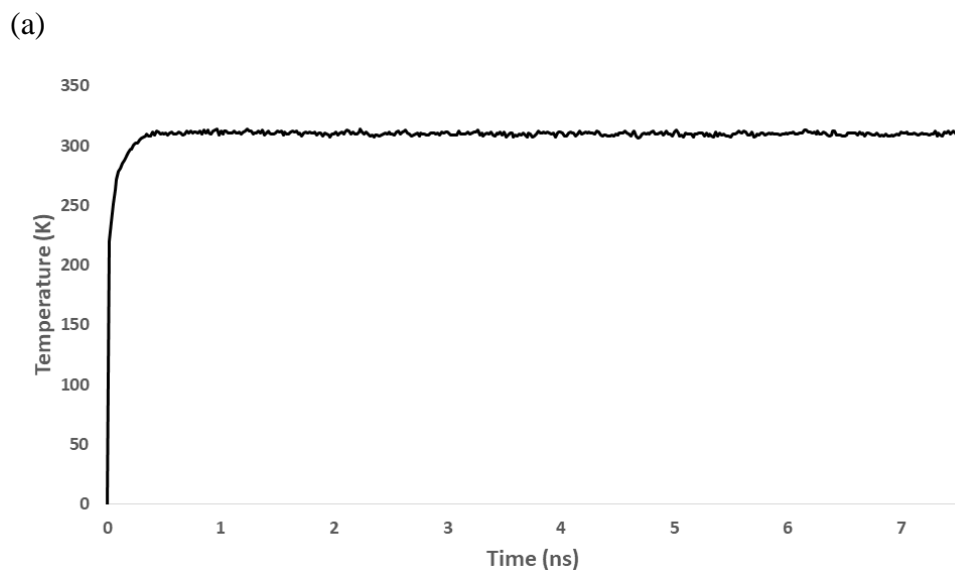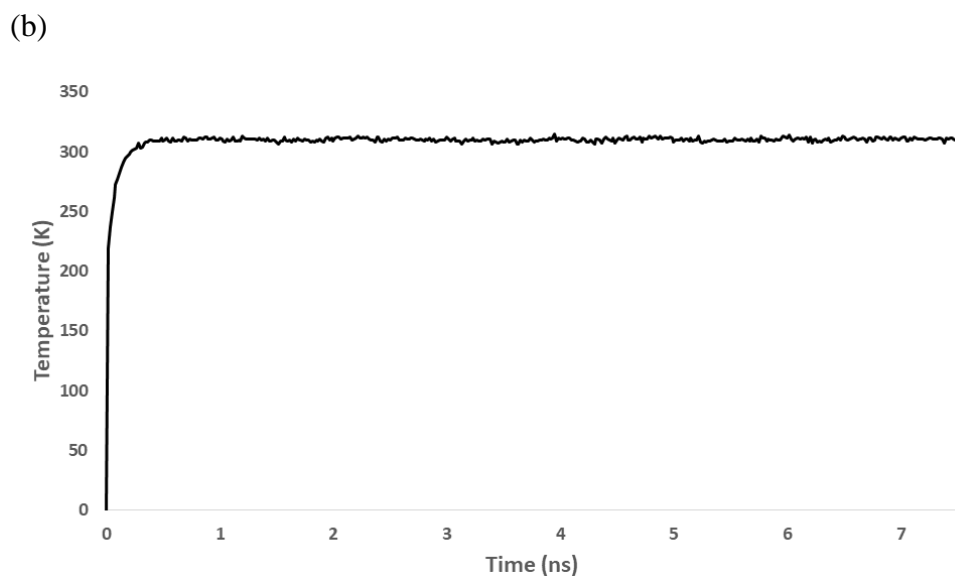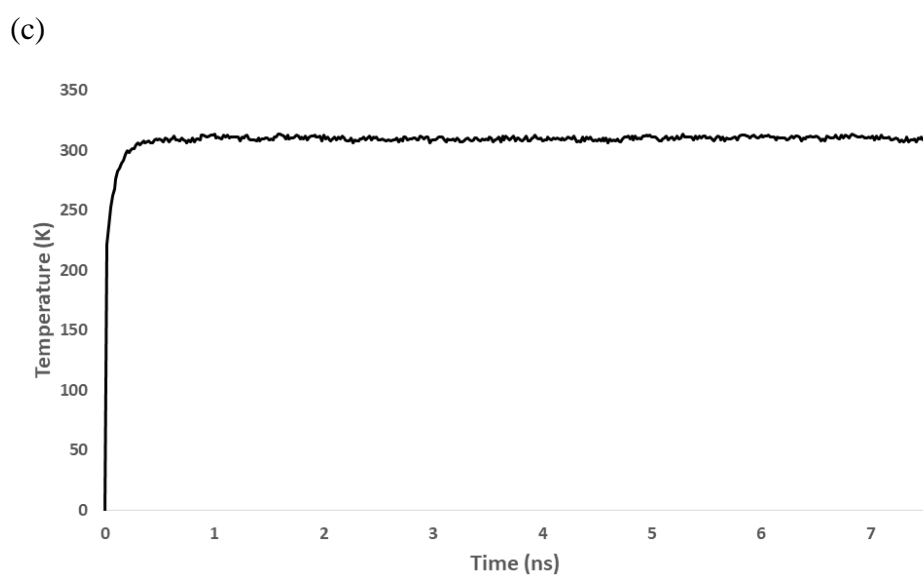

Figure S1: MD simulation: Temperature profile during 7 ns for the (a) **TAK-285**, (b) **1a**, (c) **1d**.

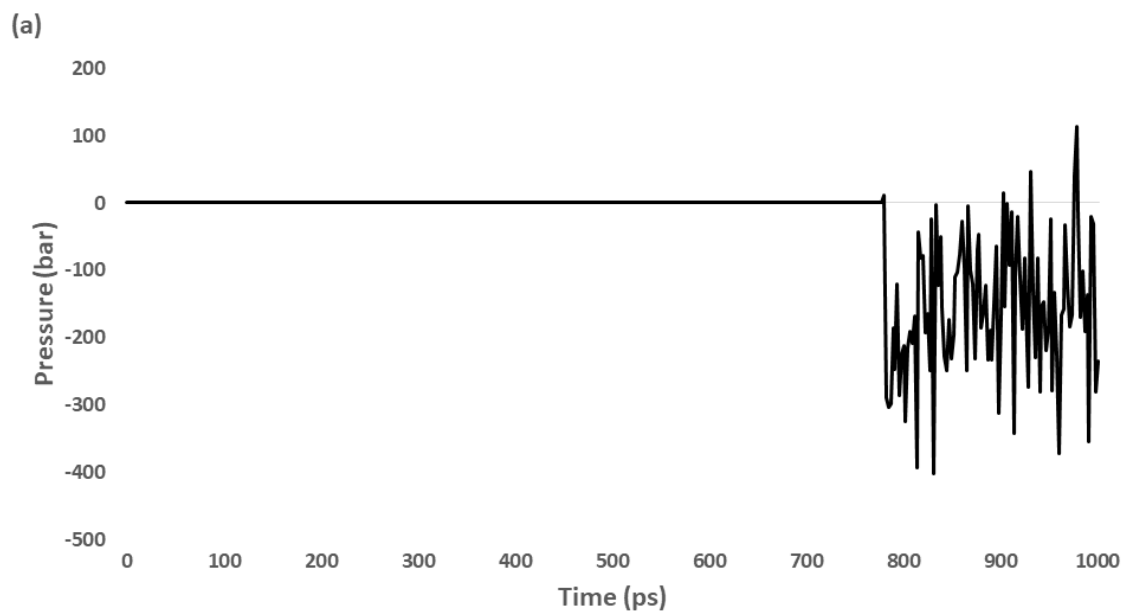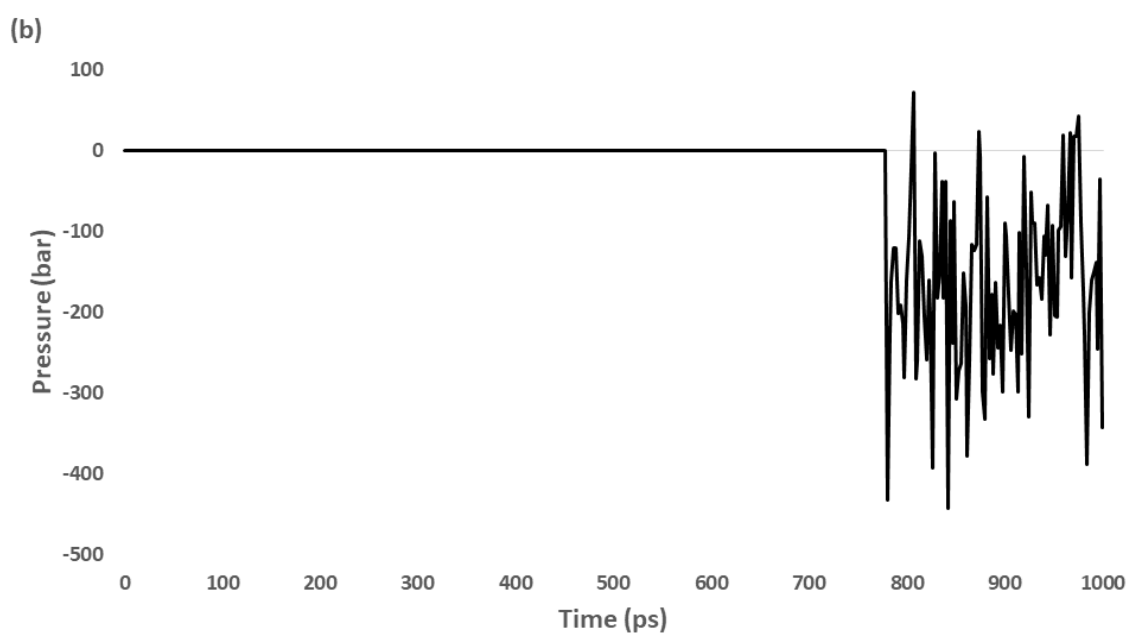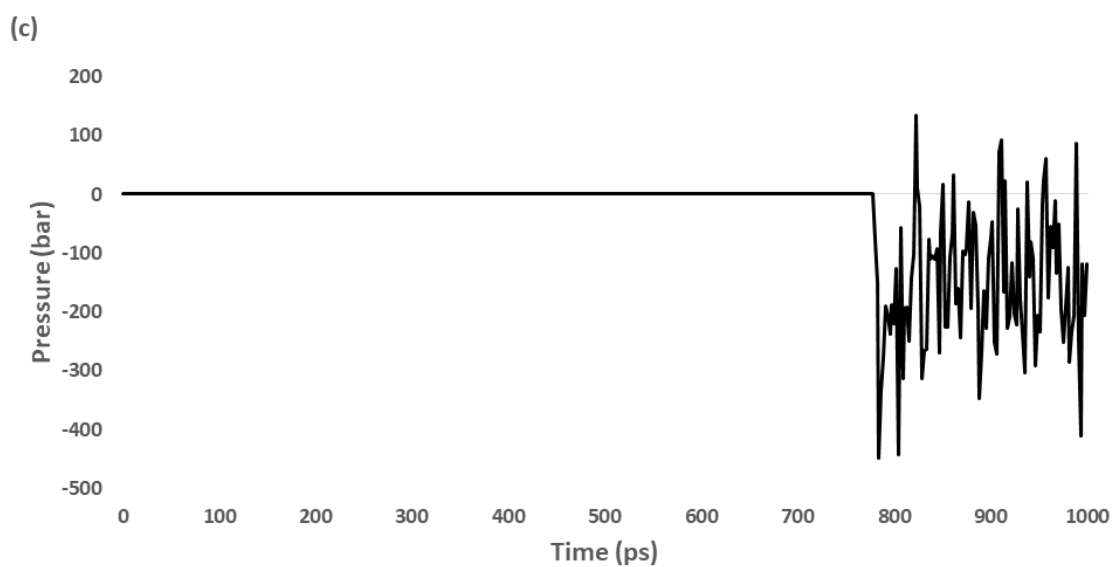

Figure S2: MD simulation: pressure profile during equilibration for the (a) TAK-285, (b) 1a, (c) 1d.

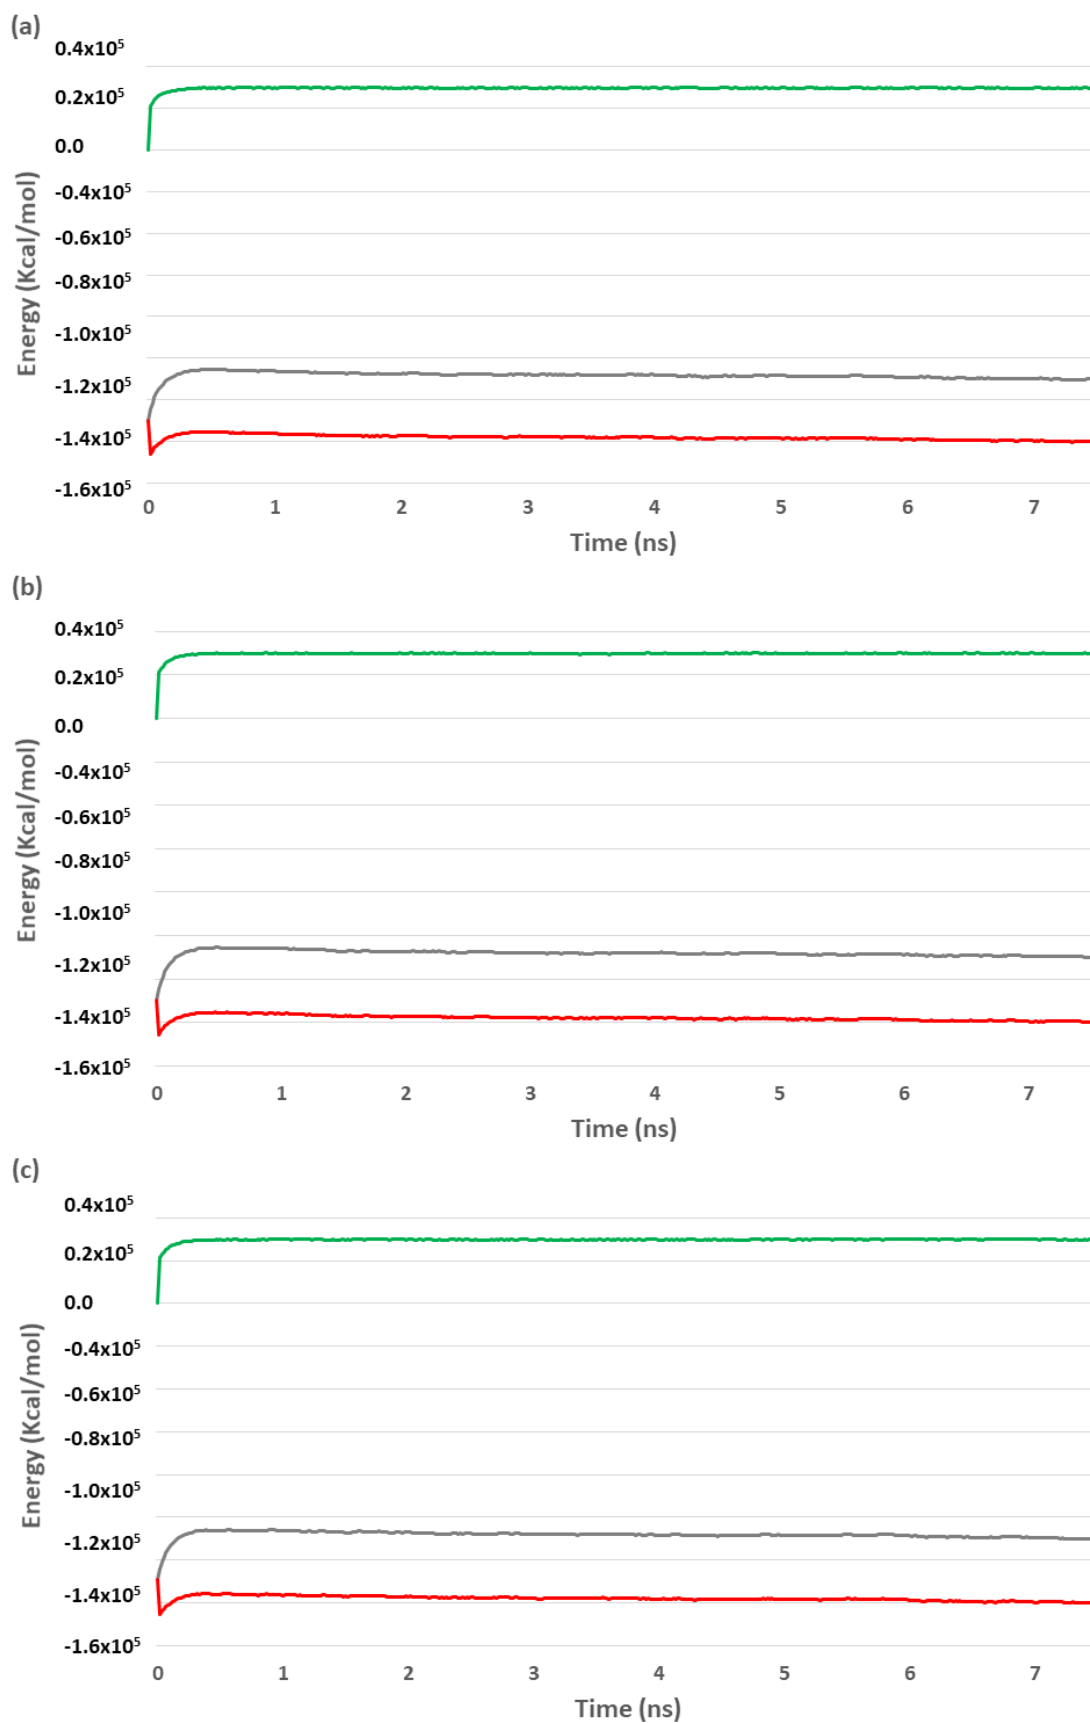

Figure S3. MD simulation: Energy profile for the (a) TAK-285, (b) 1a, (c) 1d. total energy (grey color), potential energy (red color), kinetic energy (green color)
